# Supplementary material for: Can we predict the formability of perovskite oxynitrides from tolerance and octahedral factors?
Source: Royal Society of Chemistry journal article supplement (doi:10.1039/c3ta10216e), 2013-01-01
Supplement: c3ta10216e.pdf [file c3ta10216e.pdf]

## Supplementary material

### Can we predict the formability of perovskite oxynitrides from tolerance and octahedral factors?

Wenjie Li, Emanuel Ionescu, Ralf Riedel and Aleksander Gurlo

Fachbereich Material- und Geowissenschaften, Technische Universität Darmstadt, 64287 Darmstadt, Germany. E-mail: [W.Li@materials.tu-darmstadt.de](mailto:W.Li@materials.tu-darmstadt.de), Fax: +49(0)6151-16-6346, Tel: +49(0)6151-16-75318

#### Structure field map

**Table S 1.** Tolerance and octahedral factors of perovskite oxynitrides synthesized so far. The tolerance and octahedral factors are calculated according to the eqs. 1 and 2 and Table 3 (see main text).

| Material/Ref                                       | Structure     | Parameters calculated from interatomic distance <sup>a</sup> |                   | Ref | Parameters calculated from ionic radii for oxides <sup>b</sup> |                   |
|----------------------------------------------------|---------------|--------------------------------------------------------------|-------------------|-----|----------------------------------------------------------------|-------------------|
|                                                    |               | Tolerance factor                                             | Octahedral factor |     | Tolerance factor                                               | Octahedral factor |
| SrWO <sub>2</sub> N                                | <i>Pm-3m</i>  | 0.9998                                                       | 0.3891            | 1   | 0.989616                                                       | 0.432789          |
| SrMoO <sub>2.5</sub> N <sub>0.5</sub>              | <i>Pm-3m</i>  | 0.9996                                                       | 0.3884            | 2   | 0.994462                                                       | 0.425808          |
| BaTaO <sub>2</sub> N                               | <i>Pm-3m</i>  | 1.0420                                                       | 0.4354            | 3   | 1.038066                                                       | 0.446750          |
| BaNbO <sub>2</sub> N                               | <i>Pm-3m</i>  | 1.0420                                                       | 0.4409            | 4   | 1.038066                                                       | 0.446750          |
| EuNbO <sub>2</sub> N                               | <i>Pm-3m</i>  | 0.9870                                                       | 0.4073            | 5   | 0.979383                                                       | 0.44674963        |
| EuTaO <sub>2</sub> N                               | <i>Pm-3m</i>  | 0.9991                                                       | 0.4031            | 6   | 0.979383                                                       | 0.44674963        |
| EuWO <sub>1.58</sub> N <sub>1.42</sub>             | <i>Pm-3m</i>  | 0.9998                                                       | 0.3718            | 7   | 0.988927                                                       | 0.4327887         |
| LaNbON <sub>2</sub>                                | <i>Pnma</i>   | 0.9842                                                       | 0.4054            | 8   | 0.948883                                                       | 0.436593          |
| CaTaO <sub>2</sub> N                               | <i>Pnma</i>   | 0.9490                                                       | 0.4161            | 9   | 0.945947                                                       | 0.446750          |
|                                                    | <i>Pnma</i>   | 0.9808                                                       | 0.4100            | 6   |                                                                |                   |
| NdTiO <sub>2</sub> N                               | <i>Pnma</i>   | 0.9410                                                       | 0.3955            | 10  | 0.937905                                                       | 0.422318          |
| LaZrO <sub>2</sub> N                               | <i>Pnma</i>   | 0.9200                                                       | 0.4903            | 9   | 0.917357                                                       | 0.502593          |
| SrNbO <sub>2</sub> N                               | <i>Pnma</i>   | 0.9969                                                       | 0.4155            | 11  | 0.980065                                                       | 0.446750          |
| PrZrO <sub>2</sub> N                               | <i>Pmna</i>   | 0.8618                                                       | 0.5008            | 2   | 0.921956                                                       | 0.502593          |
| NdZrO <sub>2</sub> N                               | <i>Pmna</i>   | 0.8625                                                       | 0.4938            | 12  | 0.887791                                                       | 0.502593          |
| SmZrO <sub>2</sub> N                               | <i>Pmna</i>   | 0.8272                                                       | 0.5217            | 12  | 0.877936                                                       | 0.50259333        |
| CaMoO <sub>1.7</sub> N <sub>1.3</sub>              | <i>Pbnm</i>   | 0.9823                                                       | 0.3921            | 13  | 0.959842                                                       | 0.425808          |
| NdVO <sub>2</sub> N <sup>*1</sup>                  | <i>Pbnm</i>   | 0.9745                                                       | 0.3486            | 14  | 0.949557                                                       | 0.40486685        |
| CaNbO <sub>2</sub> N                               | <i>I4/mcm</i> | 0.9191                                                       | 0.4203            | 15  | 0.945947                                                       | 0.446750          |
| SrTaO <sub>2</sub> N                               | <i>I4/mcm</i> | 0.9986                                                       | 0.4098            | 16  | 0.980065                                                       | 0.446750          |
|                                                    |               | 0.9982                                                       | 0.4085            | 17  |                                                                |                   |
|                                                    |               | 0.9973                                                       | 0.4105            | 9   |                                                                |                   |
| LaWO <sub>0.6</sub> N <sub>2.4</sub>               | <i>I-4</i>    | 1.0046                                                       | 0.3593            | 18  | 0.957983                                                       | 0.422949          |
| LaTiO <sub>2</sub> N                               | <i>Imma</i>   | 0.9860                                                       | 0.3974            | 10  | 0.969139                                                       | 0.422318          |
| LaTaON <sub>2</sub>                                | <i>C2/m</i>   | 0.9560                                                       | 0.3982            | 16  | 0.948883                                                       | 0.436593          |
| LaVO <sub>2.1</sub> N <sub>0.9</sub> <sup>*2</sup> | -             | -                                                            | -                 | 19  | 0.981180                                                       | 0.404867          |
| NdWO <sub>0.8</sub> N <sub>2.2</sub> <sup>*2</sup> | -             | -                                                            | -                 | 20  | 0.927472                                                       | 0.42294916        |
| NdNbON <sub>2</sub> <sup>*2</sup>                  | <i>Pnma</i>   | -                                                            | -                 | 21  | 0.918663                                                       | 0.43659269        |
| PrNbON <sub>2</sub> <sup>*2</sup>                  | <i>Pnma</i>   | -                                                            | -                 | 21  | 0.953584                                                       | 0.436593          |

\*1: structure refinement is performed; the cation-anion distances  $d_{A-X}$  is not available

\*2: structure refinement is not performed; the cation-anion distances  $d_{A-X}$  and  $d_{B-X}$  are not available

<sup>a</sup>: calculated based on average cation-anion distances from refinement results of neutron diffraction (see main text Table 5 and 8)

<sup>b</sup>: calculated based on ionic radii for oxides (see main text Table 6 and 8)

**Table S 2.** Tolerance and octahedral factors of non-perovskite oxynitrides. The tolerance and octahedral factors are calculated according to the eqs. 1 and 2 and Table 3(see main text).

| Material/Ref                                                             | Structure<br>Space Group                      | Parameters under room temperature |                      | Ref    |
|--------------------------------------------------------------------------|-----------------------------------------------|-----------------------------------|----------------------|--------|
|                                                                          |                                               | Tolerance<br>factor               | Octahedral<br>factor |        |
| Mn <sub>2</sub> (MnTa <sub>3</sub> )N <sub>6-x</sub> O <sub>2+x</sub>    | Spinel <i>Fd3m</i>                            | 0.7015                            | 0.4728               | 22     |
| NdWO <sub>3.05</sub> N <sub>0.95</sub>                                   | Scheelite <i>I41/a</i>                        | 0.9679                            | 0.2621               | 7      |
| KOsO <sub>3</sub> N                                                      | Scheelite <i>I41/a</i>                        | 1.1641                            | 0.2020               | 23     |
| RbOsO <sub>3</sub> N                                                     | Scheelite <i>I41/a</i>                        | 1.7936                            | 0.1921               | 24     |
| Sr <sub>2</sub> TaO <sub>3</sub> N                                       | K <sub>2</sub> NiF <sub>4</sub> <i>I4/mmm</i> | 0.7489                            | 0.4090               | 25, 26 |
| Ba <sub>2</sub> TaO <sub>3</sub> N                                       | K <sub>2</sub> NiF <sub>4</sub> <i>I4/mmm</i> | 0.7598                            | 0.4272               | 13, 27 |
| Sr <sub>2</sub> NbO <sub>2.8</sub> N                                     | K <sub>2</sub> NiF <sub>4</sub> <i>I4/mmm</i> | 0.7484                            | 0.4112               | 28     |
| Nb <sub>0.6</sub> Al <sub>0.08</sub> O <sub>0.21</sub> N <sub>0.79</sub> | Rock-salt <i>I4/m</i>                         | 0.7581                            | 0.4020               | 29     |
| Nd <sub>2</sub> Ta <sub>2</sub> O <sub>5</sub> N <sub>2</sub>            | Pyrochlore                                    | 0.7757                            | 0.4380               | 30     |
| Na <sub>3</sub> WO <sub>3</sub> N                                        | Others <i>Pmn21</i>                           | 0.8457                            | 0.0332               | 31     |
| Na <sub>3</sub> MoO <sub>3</sub> N                                       | Others <i>Pmn21</i>                           | 0.8404                            | 0.0379               | 32     |
| Ba <sub>3</sub> ZnN <sub>2</sub> O                                       | Others <i>P4/mmm</i>                          | 0.9897                            | 0.2709               | 33     |
| Ba <sub>3</sub> W <sub>2</sub> O <sub>6.27</sub> N <sub>1.73</sub>       | Others <i>R-3m</i>                            | 3.6632                            | 0.0325               | 34     |
| Ba <sub>3</sub> Mo <sub>2</sub> O <sub>6.04</sub> N <sub>1.96</sub>      | Others <i>R-3m</i>                            | 3.6589                            | 0.0255               | 32     |
| Ba <sub>2</sub> VO <sub>3</sub> N                                        | Others <i>Pnma</i>                            | 1.0354                            | 0.2076               | 25     |

**Table S 3** The bond distance A-X, B-X, tolerance and octahedral factors based on geometric and arithmetic means

| Composition                              |                 | LaNbON <sub>2</sub> | CaTaO <sub>2</sub> N | SrTaO <sub>2</sub> N | LaTiO <sub>2</sub> N | CaMoO <sub>1.7</sub> N <sub>1.3</sub> | LaWO <sub>0.6</sub> N <sub>2.4</sub> | CaNbO <sub>2</sub> N | SrNbO <sub>2</sub> N | NdVO <sub>2</sub> N |        |
|------------------------------------------|-----------------|---------------------|----------------------|----------------------|----------------------|---------------------------------------|--------------------------------------|----------------------|----------------------|---------------------|--------|
| Experimental data by Neutron diffraction | Geometric mean  | A-X                 | 2.8677               | 2.802                | 2.8523               | 2.7915                                | 2.7707                               | 2.8311               | 2.6446               | 2.8591              | 2.7245 |
|                                          |                 | B-X                 | 2.0602               | 2.02                 | 2.0197               | 2.002                                 | 1.9943                               | 1.9927               | 2.0346               | 2.0278              | 1.9769 |
|                                          |                 | t                   | 0.9842               | 0.9809               | 0.9986               | 0.986                                 | 0.9824                               | 1.0046               | 0.9191               | 0.9970              | 0.9745 |
|                                          |                 | O <sub>t</sub>      | 0.4054               | 0.4100               | 0.4098               | 0.3974                                | 0.3921                               | 0.3593               | 0.4203               | 0.4155              | 0.3486 |
|                                          | Arithmetic mean | A-X                 | 2.8798               | 2.8167               | 2.8533               | 2.7991                                | 2.7862                               | 2.834                | 2.6556               | 2.8615              | 2.7373 |
|                                          |                 | B-X                 | 2.0602               | 2.02                 | 2.0197               | 2.002                                 | 1.9943                               | 1.9927               | 2.0347               | 2.0278              | 1.977  |
|                                          |                 | t                   | 0.9886               | 0.9861               | 0.9991               | 0.9888                                | 0.9880                               | 1.0058               | 0.9230               | 0.9980              | 0.9792 |
|                                          |                 | O <sub>t</sub>      | 0.4054               | 0.4100               | 0.4098               | 0.3975                                | 0.3921                               | 0.3594               | 0.4203               | 0.4154              | 0.3800 |
| Prediction by ionic radii                | Geometric mean  | A-X                 | 2.8263               | 2.7729               | 2.8729               | 2.7929                                | 2.7729                               | 2.8263               | 2.7729               | 2.8729              | 2.7029 |
|                                          |                 | B-X                 | 2.1061               | 2.0728               | 2.0728               | 2.0378                                | 2.0428                               | 2.0861               | 2.0728               | 2.0728              | 2.0128 |
|                                          | Arithmetic mean | A-X                 | 2.8267               | 2.7733               | 2.8733               | 2.7933                                | 2.7733                               | 2.8267               | 2.7733               | 2.8733              | 2.7033 |
|                                          |                 | B-X                 | 2.1067               | 2.0733               | 2.0733               | 2.0383                                | 2.0433                               | 2.0867               | 2.0733               | 2.0733              | 2.0133 |

t: tolerance factor; O<sub>t</sub>: Octahedral factor

**Figure S1.** Location of perovskite oxynitrides with different crystal symmetry in the structure field map from Figure 2.

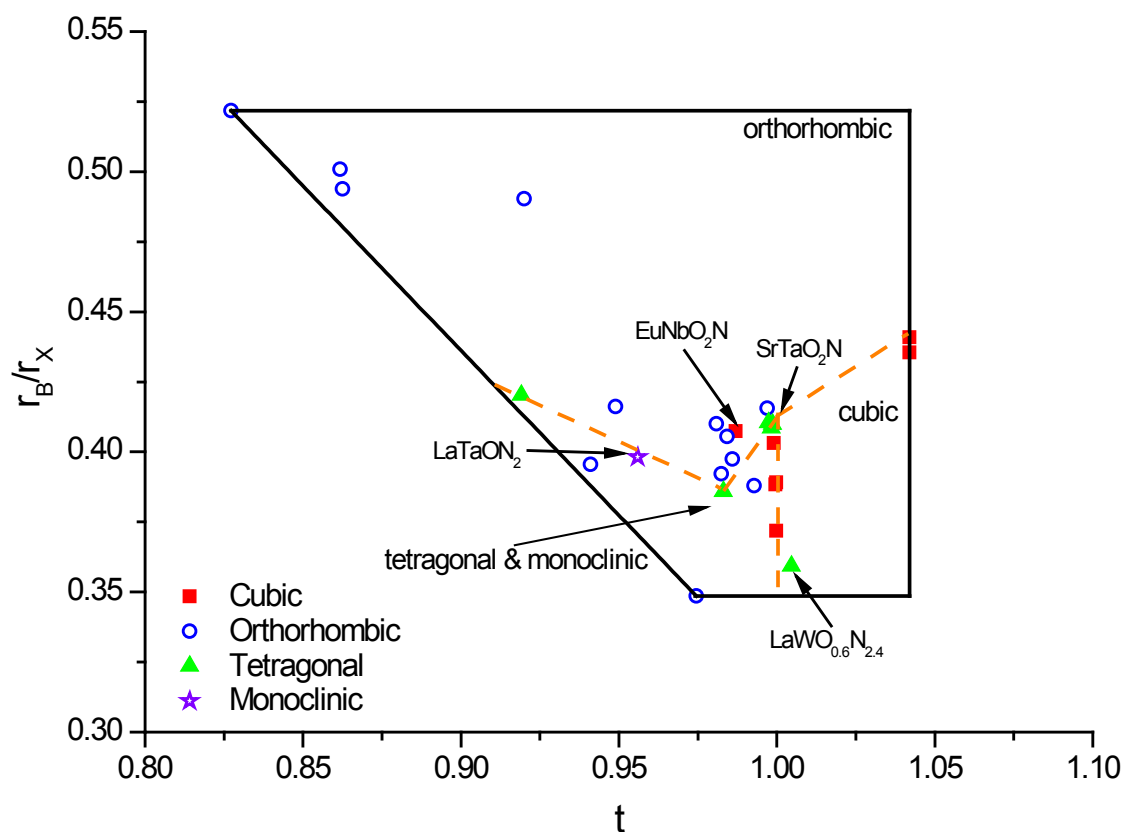

## Prediction

**Table S 4.** Combination of A and B cations in  $\text{AB}(\text{O},\text{N})_3$  perovskites applied for the calculation of the tolerance and octahedral factors listed in the Table S4 and displayed in the Figure 3.

| $\text{AB}(\text{O},\text{N})_3$<br>perovskites | A-site                                                                                                                          | B-site                                                                                                                                                                                                                         |
|-------------------------------------------------|---------------------------------------------------------------------------------------------------------------------------------|--------------------------------------------------------------------------------------------------------------------------------------------------------------------------------------------------------------------------------|
| $\text{A}^+\text{B}^{6+}\text{O}_2\text{N}$     | $\text{Li}^+, \text{Na}^+, \text{K}^+$                                                                                          | $\text{Mo}^{6+}, \text{W}^{6+}$                                                                                                                                                                                                |
| $\text{A}^{2+}\text{B}^{5+}\text{O}_2\text{N}$  | $\text{Mg}^{2+}, \text{Ca}^{2+}, \text{Sr}^{2+}, \text{Ba}^{2+}, \text{Zn}^{2+}, \text{Cd}^{2+}, \text{Eu}^{2+}$                | $\text{V}^{5+}, \text{Nb}^{5+}, \text{Ta}^{5+}, \text{Mo}^{5+}, \text{W}^{5+}$                                                                                                                                                 |
| $\text{A}^{2+}\text{B}^{6+}\text{ON}_2$         | $\text{Mg}^{2+}, \text{Ca}^{2+}, \text{Sr}^{2+}, \text{Ba}^{2+}, \text{Zn}^{2+}, \text{Cd}^{2+}, \text{Eu}^{2+}$                | $\text{Mo}^{6+}, \text{W}^{6+}$                                                                                                                                                                                                |
| $\text{A}^{3+}\text{B}^{4+}\text{O}_2\text{N}$  | $\text{Sc}^{3+}, \text{Y}^{3+}, \text{Ga}^{3+}, \text{In}^{3+}, \text{La}^{3+}, \text{Pr}^{3+}, \text{Nd}^{3+}, \text{Sm}^{3+}$ | $\text{Si}^{4+}, \text{Ge}^{4+}, \text{Sn}^{4+}, \text{Ti}^{4+}, \text{Zr}^{4+}, \text{Hf}^{4+}, \text{Mn}^{4+}, \text{Fe}^{4+}, \text{Co}^{4+}, \text{V}^{4+}, \text{Nb}^{4+}, \text{Ta}^{4+}, \text{Mo}^{4+}, \text{W}^{4+}$ |
| $\text{A}^{3+}\text{B}^{5+}\text{ON}_2$         | $\text{Sc}^{3+}, \text{Y}^{3+}, \text{Ga}^{3+}, \text{In}^{3+}, \text{La}^{3+}, \text{Pr}^{3+}, \text{Nd}^{3+}, \text{Sm}^{3+}$ | $\text{V}^{5+}, \text{Nb}^{5+}, \text{Ta}^{5+}, \text{Mo}^{5+}, \text{W}^{5+}$                                                                                                                                                 |

**Table S 5.** Tolerance and octahedral factors of metal oxynitrides calculated according to the Table 6 (see main text). These factors are applied in the Figure 3 (see main text). “S” refers for perovskite oxynitrides synthesized so far, “P” stays for the perovskite oxynitrides predicted in our model, N - for perovskite structure is not stable, non-stoichiometric perovskite

| Compounds                                            | t        | r <sub>B</sub> /r <sub>X</sub> | Formability       |
|------------------------------------------------------|----------|--------------------------------|-------------------|
| <b>ABO<sub>2</sub>N A<sup>1+</sup>B<sup>6+</sup></b> |          |                                |                   |
| LiMoO <sub>2</sub> N                                 | 0.938464 | 0.41184731                     | P                 |
| LiWO <sub>2</sub> N                                  | 0.933846 | 0.41882777                     | P                 |
| NaMoO <sub>2</sub> N                                 | 0.986816 | 0.41184731                     | P                 |
| NaWO <sub>2</sub> N                                  | 0.98196  | 0.41882777                     | P                 |
| KMoO <sub>2</sub> N                                  | 1.07422  | 0.41184731                     | N                 |
| KWO <sub>2</sub> N                                   | 1.068934 | 0.41882777                     | N                 |
| <b>A<sup>2+</sup>B<sup>5+</sup></b>                  |          |                                |                   |
| MgVO <sub>2</sub> N                                  | 0.940854 | 0.376945                       | N                 |
| MgNbO <sub>2</sub> N                                 | 0.895451 | 0.44674963                     | N                 |
| MgTaO <sub>2</sub> N                                 | 0.895451 | 0.44674963                     | N                 |
| MgMoO <sub>2</sub> N                                 | 0.908605 | 0.42580824                     | N                 |
| MgWO <sub>2</sub> N                                  | 0.904178 | 0.4327887                      | N                 |
| CaVO <sub>2</sub> N                                  | 0.993910 | 0.376945                       | N                 |
| CaNbO <sub>2</sub> N                                 | 0.945947 | 0.446750                       | S/P               |
| CaTaO <sub>2</sub> N                                 | 0.945947 | 0.446750                       | S/P               |
| CaMoO <sub>2</sub> N                                 | 0.959842 | 0.425808                       | S <sup>3</sup> /P |
| CaWO <sub>2</sub> N                                  | 0.955165 | 0.432789                       | P                 |
| SrVO <sub>2</sub> N                                  | 1.029758 | 0.376945                       | N                 |
| SrNbO <sub>2</sub> N                                 | 0.980065 | 0.446750                       | S/P               |
| SrTaO <sub>2</sub> N                                 | 0.980065 | 0.446750                       | S/P               |
| SrMoO <sub>2</sub> N                                 | 0.994462 | 0.425808                       | S <sup>3</sup> /P |
| SrWO <sub>2</sub> N                                  | 0.989616 | 0.432789                       | S/P               |
| BaVO <sub>2</sub> N                                  | 1.090699 | 0.376945                       | N                 |
| BaNbO <sub>2</sub> N                                 | 1.038066 | 0.446750                       | S/P               |
| BaTaO <sub>2</sub> N                                 | 1.038066 | 0.446750                       | S/P               |
| BaMoO <sub>2</sub> N                                 | 1.053314 | 0.425808                       | N                 |
| BaWO <sub>2</sub> N                                  | 1.048182 | 0.432789                       | N                 |
| ZnVO <sub>2</sub> N                                  | 0.941693 | 0.376945                       | N                 |
| ZnNbO <sub>2</sub> N                                 | 0.89625  | 0.44674963                     | N                 |
| ZnTaO <sub>2</sub> N                                 | 0.89625  | 0.44674963                     | N                 |
| ZnMoO <sub>2</sub> N                                 | 0.909415 | 0.42580824                     | N                 |
| ZnWO <sub>2</sub> N                                  | 0.904984 | 0.4327887                      | N                 |
| CdVO <sub>2</sub> N                                  | 0.983155 | 0.376945                       | N                 |
| CdNbO <sub>2</sub> N                                 | 0.935711 | 0.44674963                     | P                 |
| CdTaO <sub>2</sub> N                                 | 0.935711 | 0.44674963                     | P                 |
| CdMoO <sub>2</sub> N                                 | 0.949457 | 0.42580824                     | P                 |
| CdWO <sub>2</sub> N                                  | 0.94483  | 0.4327887                      | P                 |
| EuVO <sub>2</sub> N                                  | 1.029041 | 0.376945                       | N                 |
| EuNbO <sub>2</sub> N                                 | 0.979383 | 0.44674963                     | S/P               |
| EuTaO <sub>2</sub> N                                 | 0.979383 | 0.44674963                     | S/P               |
| EuMoO <sub>2</sub> N                                 | 0.99377  | 0.42580824                     | P                 |
| EuWO <sub>2</sub> N                                  | 0.988927 | 0.4327887                      | S <sup>3</sup> /P |
| <b>A<sup>3+</sup>B<sup>4+</sup></b>                  |          |                                |                   |
| ScSiO <sub>2</sub> N                                 | 0.973386 | 0.27921852                     | N                 |
| ScGeO <sub>2</sub> N                                 | 0.908896 | 0.36996453                     | N                 |
| ScSnO <sub>2</sub> N                                 | 0.840373 | 0.48165194                     | N                 |
| ScTiO <sub>2</sub> N                                 | 0.875436 | 0.42231801                     | N                 |
| ScZrO <sub>2</sub> N                                 | 0.82866  | 0.50259333                     | N                 |
| ScHfO <sub>2</sub> N                                 | 0.832528 | 0.49561287                     | N                 |
| ScMnO <sub>2</sub> N                                 | 0.908896 | 0.36996453                     | N                 |
| ScFeO <sub>2</sub> N                                 | 0.884115 | 0.40835708                     | N                 |
| ScCoO <sub>2</sub> N                                 | 0.908896 | 0.36996453                     | N                 |
| ScVO <sub>2</sub> N                                  | 0.886312 | 0.40486685                     | N                 |
| ScNbO <sub>2</sub> N                                 | 0.844352 | 0.47467148                     | N                 |
| ScTaO <sub>2</sub> N                                 | 0.844352 | 0.47467148                     | N                 |
| ScMoO <sub>2</sub> N                                 | 0.856517 | 0.45373009                     | N                 |
| ScWO <sub>2</sub> N                                  | 0.852423 | 0.46071055                     | N                 |
| YSiO <sub>2</sub> N                                  | 1.035629 | 0.27921852                     | N                 |
| YGeO <sub>2</sub> N                                  | 0.967015 | 0.36996453                     | N                 |
| YSnO <sub>2</sub> N                                  | 0.894111 | 0.48165194                     | P                 |
| YTiO <sub>2</sub> N                                  | 0.931415 | 0.42231801                     | P                 |
| YZrO <sub>2</sub> N                                  | 0.881648 | 0.50259333                     | P                 |
| YHfO <sub>2</sub> N                                  | 0.885764 | 0.49561287                     | P                 |
| YMnO <sub>2</sub> N                                  | 0.967015 | 0.36996453                     | N                 |
| YFeO <sub>2</sub> N                                  | 0.94065  | 0.40835708                     | P                 |
| YCoO <sub>2</sub> N                                  | 0.967015 | 0.36996453                     | N                 |
| YVO <sub>2</sub> N                                   | 0.942987 | 0.40486685                     | P                 |
| YNbO <sub>2</sub> N                                  | 0.898344 | 0.47467148                     | P                 |
| YTaO <sub>2</sub> N                                  | 0.898344 | 0.47467148                     | P                 |
| YMoO <sub>2</sub> N                                  | 0.911286 | 0.45373009                     | P                 |
| YWO <sub>2</sub> N                                   | 0.906931 | 0.46071055                     | P                 |
| GaSiO <sub>2</sub> N                                 | 0.966324 | 0.27921852                     | N                 |
| GaGeO <sub>2</sub> N                                 | 0.902302 | 0.36996453                     | N                 |
| GaSnO <sub>2</sub> N                                 | 0.834277 | 0.48165194                     | N                 |
| GaTiO <sub>2</sub> N                                 | 0.869074 | 0.42231801                     | N                 |
| GaZrO <sub>2</sub> N                                 | 0.822638 | 0.50259333                     | N                 |
| GaHfO <sub>2</sub> N                                 | 0.826488 | 0.49561287                     | N                 |
| GaMnO <sub>2</sub> N                                 | 0.902291 | 0.36996453                     | N                 |
| GaFeO <sub>2</sub> N                                 | 0.87769  | 0.40835708                     | N                 |
| GaCoO <sub>2</sub> N                                 | 0.902291 | 0.36996453                     | N                 |
| GaVO <sub>2</sub> N                                  | 0.879871 | 0.40486685                     | N                 |
| GaNbO <sub>2</sub> N                                 | 0.838216 | 0.47467148                     | N                 |
| GaTaO <sub>2</sub> N                                 | 0.838216 | 0.47467148                     | N                 |
| GaMoO <sub>2</sub> N                                 | 0.850292 | 0.45373009                     | N                 |
| GaWO <sub>2</sub> N                                  | 0.846229 | 0.46071055                     | N                 |
| InSiO <sub>2</sub> N                                 | 1.027409 | 0.27921852                     | N                 |
| InGeO <sub>2</sub> N                                 | 0.959341 | 0.36996453                     | N                 |
| InSnO <sub>2</sub> N                                 | 0.887015 | 0.48165194                     | N                 |
| InTiO <sub>2</sub> N                                 | 0.924023 | 0.42231801                     | N                 |
| InZrO <sub>2</sub> N                                 | 0.874651 | 0.50259333                     | N                 |
| InHfO <sub>2</sub> N                                 | 0.878734 | 0.49561287                     | N                 |
| InMnO <sub>2</sub> N                                 | 0.959341 | 0.36996453                     | N                 |
| InFeO <sub>2</sub> N                                 | 0.933184 | 0.40835708                     | N                 |
| InCoO <sub>2</sub> N                                 | 0.959341 | 0.36996453                     | N                 |
| InVO <sub>2</sub> N                                  | 0.935503 | 0.40486685                     | N                 |
| InNbO <sub>2</sub> N                                 | 0.891214 | 0.47467148                     | N                 |
| InTaO <sub>2</sub> N                                 | 0.891214 | 0.47467148                     | N                 |
| InMoO <sub>2</sub> N                                 | 0.904054 | 0.45373009                     | N                 |
| InWO <sub>2</sub> N                                  | 0.899733 | 0.46071055                     | N                 |
| LaSiO <sub>2</sub> N                                 | 1.077573 | 0.27921852                     | N                 |
| LaGeO <sub>2</sub> N                                 | 1.006181 | 0.36996453                     | N                 |
| LaSnO <sub>2</sub> N                                 | 0.930324 | 0.48165194                     | P                 |
| LaTiO <sub>2</sub> N                                 | 0.969139 | 0.422318                       | S/P               |
| LaZrO <sub>2</sub> N                                 | 0.917357 | 0.502593                       | S/P               |
| LaHfO <sub>2</sub> N                                 | 0.921639 | 0.49561287                     | P                 |
| LaMnO <sub>2</sub> N                                 | 1.006181 | 0.36996453                     | N                 |
| LaFeO <sub>2</sub> N                                 | 0.978748 | 0.40835708                     | P                 |
| LaCoO <sub>2</sub> N                                 | 1.006181 | 0.36996453                     | N                 |
| LaVO <sub>2</sub> N                                  | 0.981180 | 0.404867                       | S <sup>3</sup> /P |
| LaNbO <sub>2</sub> N                                 | 0.934728 | 0.474671                       | P                 |
| LaTaO <sub>2</sub> N                                 | 0.934728 | 0.474671                       | P                 |
| LaMoO <sub>2</sub> N                                 | 0.948195 | 0.453730                       | P                 |
| LaWO <sub>2</sub> N                                  | 0.943663 | 0.460711                       | P                 |
| PrSiO <sub>2</sub> N                                 | 1.082976 | 0.27921852                     | N                 |
| PrGeO <sub>2</sub> N                                 | 1.011225 | 0.36996453                     | N                 |
| PrSnO <sub>2</sub> N                                 | 0.934988 | 0.48165194                     | P                 |
| PrTiO <sub>2</sub> N                                 | 0.973998 | 0.422318                       | P                 |
| PrZrO <sub>2</sub> N                                 | 0.921956 | 0.502593                       | S/P               |
| PrHfO <sub>2</sub> N                                 | 0.926259 | 0.49561287                     | P                 |
| PrMnO <sub>2</sub> N                                 | 1.011225 | 0.36996453                     | N                 |
| PrFeO <sub>2</sub> N                                 | 0.983654 | 0.40835708                     | P                 |
| PrCoO <sub>2</sub> N                                 | 1.011225 | 0.36996453                     | N                 |
| PrVO <sub>2</sub> N                                  | 0.986099 | 0.404867                       | P                 |
| PrNbO <sub>2</sub> N                                 | 0.939414 | 0.474671                       | P                 |
| PrTaO <sub>2</sub> N                                 | 0.939414 | 0.474671                       | P                 |
| PrMoO <sub>2</sub> N                                 | 0.952949 | 0.453730                       | P                 |
| PrWO <sub>2</sub> N                                  | 0.948394 | 0.460711                       | P                 |
| NdSiO <sub>2</sub> N                                 | 1.042845 | 0.27921852                     | N                 |
| NdGeO <sub>2</sub> N                                 | 0.973753 | 0.36996453                     | N                 |
| NdSnO <sub>2</sub> N                                 | 0.900341 | 0.48165194                     | P                 |
| NdTiO <sub>2</sub> N                                 | 0.937905 | 0.422318                       | S/P               |
| NdZrO <sub>2</sub> N                                 | 0.887791 | 0.502593                       | S/P               |
| NdHfO <sub>2</sub> N                                 | 0.891935 | 0.49561287                     | P                 |
| NdMnO <sub>2</sub> N                                 | 0.973753 | 0.36996453                     | N                 |
| NdFeO <sub>2</sub> N                                 | 0.947204 | 0.40835708                     | P                 |
| NdCoO <sub>2</sub> N                                 | 0.973753 | 0.36996453                     | N                 |
| NdVO <sub>2</sub> N                                  | 0.949557 | 0.40486685                     | S/P               |
| NdNbO <sub>2</sub> N                                 | 0.904603 | 0.47467148                     | P                 |
| NdTaO <sub>2</sub> N                                 | 0.904603 | 0.47467148                     | P                 |
| NdMoO <sub>2</sub> N                                 | 0.917636 | 0.45373009                     | P                 |
| NdWO <sub>2</sub> N                                  | 0.91325  | 0.46071055                     | P                 |
| SmSiO <sub>2</sub> N                                 | 1.031268 | 0.27921852                     | N                 |

Electronic Supplementary Material (ESI) for Journal of Materials Chemistry A  
This journal is © The Royal Society of Chemistry 2013

|                                                      |          |            |                   |
|------------------------------------------------------|----------|------------|-------------------|
| SmGeO <sub>2</sub> N                                 | 0.962944 | 0.36996453 | N                 |
| SmSnO <sub>2</sub> N                                 | 0.890346 | 0.48165194 | N                 |
| SmTiO <sub>2</sub> N                                 | 0.927493 | 0.42231801 | N                 |
| SmZrO <sub>2</sub> N                                 | 0.877936 | 0.50259333 | S/P               |
| SmHfO <sub>2</sub> N                                 | 0.882034 | 0.49561287 | N                 |
| SmMnO <sub>2</sub> N                                 | 0.962944 | 0.36996453 | N                 |
| SmFeO <sub>2</sub> N                                 | 0.936689 | 0.40835708 | P                 |
| SmCoO <sub>2</sub> N                                 | 0.962944 | 0.36996453 | N                 |
| SmVO <sub>2</sub> N                                  | 0.939017 | 0.40486685 | P                 |
| SmNbO <sub>2</sub> N                                 | 0.894561 | 0.47467148 | N                 |
| SmTaO <sub>2</sub> N                                 | 0.894561 | 0.47467148 | N                 |
| SmMoO <sub>2</sub> N                                 | 0.907449 | 0.45373009 | N                 |
| SmWO <sub>2</sub> N                                  | 0.903112 | 0.46071055 | N                 |
| <b>ABON<sub>2</sub> A<sup>2+</sup>B<sup>6+</sup></b> |          |            |                   |
| MgMoON <sub>2</sub>                                  | 0.91418  | 0.40248388 | N                 |
| MgWON <sub>2</sub>                                   | 0.909754 | 0.40930564 | N                 |
| CaMoON <sub>2</sub>                                  | 0.965085 | 0.402484   | N                 |
| CaWON <sub>2</sub>                                   | 0.960413 | 0.409306   | P                 |
| SrMoON <sub>2</sub>                                  | 0.999480 | 0.402484   | N                 |
| SrWON <sub>2</sub>                                   | 0.994641 | 0.409306   | P                 |
| BaMoON <sub>2</sub>                                  | 1.057951 | 0.402484   | N                 |
| BaWON <sub>2</sub>                                   | 1.052829 | 0.409306   | N                 |
| ZnMoON <sub>2</sub>                                  | 0.914984 | 0.40248388 | N                 |
| ZnWON <sub>2</sub>                                   | 0.910555 | 0.40930564 | N                 |
| CdMoON <sub>2</sub>                                  | 0.954766 | 0.40248388 | N                 |
| CdWON <sub>2</sub>                                   | 0.950144 | 0.40930564 | P                 |
| EuMoON <sub>2</sub>                                  | 0.998792 | 0.40248388 | N                 |
| EuWON <sub>2</sub>                                   | 0.993957 | 0.40930564 | P                 |
| <b>A<sup>3+</sup>B<sup>5+</sup></b>                  |          |            |                   |
| ScVON <sub>2</sub>                                   | 0.901012 | 0.36837508 | N                 |
| ScNbON <sub>2</sub>                                  | 0.85822  | 0.43659269 | N                 |
| ScTaON <sub>2</sub>                                  | 0.85822  | 0.43659269 | N                 |
| ScMoON <sub>2</sub>                                  | 0.870625 | 0.4161274  | N                 |
| ScWON <sub>2</sub>                                   | 0.86645  | 0.42294916 | N                 |
| YVON <sub>2</sub>                                    | 0.957876 | 0.36837508 | N                 |
| YNbON <sub>2</sub>                                   | 0.912383 | 0.43659269 | N                 |
| YTaN <sub>2</sub>                                    | 0.912383 | 0.43659269 | N                 |
| YMoON <sub>2</sub>                                   | 0.925571 | 0.4161274  | N                 |
| YWON <sub>2</sub>                                    | 0.921133 | 0.42294916 | N                 |
| GaVON <sub>2</sub>                                   | 0.89455  | 0.36837508 | N                 |
| GaNbON <sub>2</sub>                                  | 0.852065 | 0.43659269 | N                 |
| GaTaON <sub>2</sub>                                  | 0.852065 | 0.43659269 | N                 |
| GaMoON <sub>2</sub>                                  | 0.864381 | 0.4161274  | N                 |
| GaWON <sub>2</sub>                                   | 0.860236 | 0.42294916 | N                 |
| InVON <sub>2</sub>                                   | 0.950367 | 0.36837508 | N                 |
| InNbON <sub>2</sub>                                  | 0.905231 | 0.43659269 | N                 |
| InTaON <sub>2</sub>                                  | 0.905231 | 0.43659269 | N                 |
| InMoON <sub>2</sub>                                  | 0.918315 | 0.4161274  | N                 |
| InWON <sub>2</sub>                                   | 0.913912 | 0.42294916 | N                 |
| LaVON <sub>2</sub>                                   | 0.996196 | 0.368375   | N                 |
| LaNbON <sub>2</sub>                                  | 0.948883 | 0.436593   | S/P               |
| LaTaON <sub>2</sub>                                  | 0.948883 | 0.436593   | S/P               |
| LaMoON <sub>2</sub>                                  | 0.962598 | 0.416127   | P                 |
| LaWON <sub>2</sub>                                   | 0.957983 | 0.422949   | S <sup>2</sup> /P |
| PrVON <sub>2</sub>                                   | 1.001131 | 0.368375   | N                 |
| PrNbON <sub>2</sub>                                  | 0.953584 | 0.436593   | S/P               |
| PrTaON <sub>2</sub>                                  | 0.953584 | 0.436593   | P                 |
| PrMoON <sub>2</sub>                                  | 0.967367 | 0.416127   | P                 |
| PrWON <sub>2</sub>                                   | 0.962729 | 0.422949   | P                 |
| NdVON <sub>2</sub>                                   | 0.964468 | 0.36837508 | N                 |
| NdNbON <sub>2</sub>                                  | 0.918663 | 0.43659269 | N                 |
| NdTaON <sub>2</sub>                                  | 0.918663 | 0.43659269 | N                 |
| NdMoON <sub>2</sub>                                  | 0.931941 | 0.4161274  | P                 |
| NdWON <sub>2</sub>                                   | 0.927472 | 0.42294916 | S <sup>2</sup> /P |
| SmVON <sub>2</sub>                                   | 0.953892 | 0.36837508 | N                 |
| SmNbON <sub>2</sub>                                  | 0.908589 | 0.43659269 | N                 |
| SmTaON <sub>2</sub>                                  | 0.908589 | 0.43659269 | N                 |
| SmMoON <sub>2</sub>                                  | 0.921721 | 0.4161274  | N                 |
| SmWON <sub>2</sub>                                   | 0.917302 | 0.42294916 | N                 |

## References

1. I. D. Fawcett, K. V. Ramanujachary and M. Greenblatt, *Mater. Res. Bull.*, 1997, **32**, 1565-1570.
2. M. H. Yang, J. A. Rodgers, L. C. Middler, J. Oro-Sole, A. B. Jorge, A. Fuertes and J. P. Attfield, *Inorg Chem*, 2009, **48**, 11498-11500.
3. Y. I. Kim and E. Lee, *J Ceram Soc Jpn*, 2011, **119**, 371-374.
4. R. M. F. Pors, Y. Laurent, P. Bacher, G. Roult, *Mat. Res. Bull.*, 1988, **23**, 1447-1450.
5. E. C. Pascual, V. B. Gutierrez, M. Subda and R. S. Puche, *Solid State Sci.*, 2008, **10**, 1905-1909.
6. T. Motohashi, Y. Hamade, Y. Masubuchi, T. Takeda, K. Murai, A. Yoshiasa and S. Kikkawa, *Mater. Res. Bull.*, 2009, **44**, 1899-1905.
7. R. Pastrana-Fabregas, J. Isasi-Marin, C. Cascales and R. Saez-Puche, *J. Solid State Chem.*, 2007, **180**, 92-97.
8. D. Logvinovich, S. C. Ebbinghaus, A. Reller, I. Marozau, D. Ferri and A. Weidenkaff, *Z. Anorg. Allg. Chem.*, 2010, **636**, 905-912.
9. E. Günther, R. Hagenmayer and M. Jansen, *Z. Anorg. Allg. Chem.*, 2000, **626**, 1519-1525.
10. S. J. Clarke, B. P. Guinot, C. W. Michie, M. J. C. Calmont and M. J. Rosseinsky, *Chem Mater*, 2002, **14**, 288-294.
11. A. Rachel, S. G. Ebbinghaus, M. Güngerich, P. J. Klar, J. Hanss, A. Weidenkaff and A. Reller, *Thermochim Acta*, 2005, **438**, 134-143.
12. M. H. Yang, J. Oro-Sole, J. A. Rodgers, A. B. Jorge, A. Fuertes and J. P. Attfield, *Nat Chem*, 2011, **3**, 47-52.
13. D. Logvinovich, M. H. Aguirre, J. Hejtmanek, R. Aguiar, S. G. Ebbinghaus, A. Reller and A. Weidenkaff, *J. Solid State Chem.*, 2008, **181**, 2243-2249.
14. J. Oro-Solé, L. Clark, W. Bonin, J. P. Attfield and A. Fuertes, *Chem Commun*, 2013, **49**, 2430-2432.
15. Y. I. Kim, P. M. Woodward, K. Z. Baba-Kishi and C. W. Tai, *Chem Mater*, 2004, **16**, 1267-1276.
16. Y. R. Zhang, T. Motohashi, Y. Masubuchi and S. Kikkawa, *J Ceram Soc Jpn*, 2011, **119**, 581-586.
17. S. J. Clarke, K. A. Hardstone, C. W. Michie and M. J. Rosseinsky, *Chem Mater*, 2002, **14**, 2664-2669.
18. P. Bacher, P. Antoine, R. Marchand, P. Lharidon, Y. Laurent and G. Roult, *J. Solid State Chem.*, 1988, **77**, 67-71.
19. P. Antoine, R. Assabaa, P. L'Haridon, R. Marchand, Y. Laurent, C. Michel and B. Raveau, *Mater. Sci. Eng., B* 1989, **5**, 43-46.
20. R. M. Po Antoine, Y. Lament, C. Michel and B. Raveau, *Mat. Res. Bull.*, 1988, **23**, 953-957.
21. N. Kumar, A. Sundaresan and C. N. R. Rao, *Mater. Res. Bull.*, 2011, **46**, 2021-2024.
22. J. Grins, P. O. Kall and G. Svensson, *J. Solid State Chem.*, 1995, **117**, 48-54.
23. P. Y. Laurent, R. Pastuszak, P. L'Haridon and R. Marchand, *Acta Cryst. B*, 1984, **38**, 914-916.
24. P. Lharidon, R. Pastuszak and Y. Laurent, *J. Solid State Chem.*, 1982, **43**, 29-32.
25. S. J. Clarke, P. R. Chalker, J. Holman, C. W. Michie, M. Puyet and M. J. Rosseinsky, *J Am Chem Soc*, 2002, **124**, 3337-3342.
26. N. Diot, R. Marchand, J. Haines, J. M. Leger, P. Macaudiere and S. Hull, *J. Solid State Chem.*, 1999, **146**, 390-393.
27. C. Z. Ye, J. Yang, L. X. Yao and N. Y. Chen, *Chinese Sci Bull*, 2002, **47**, 458-460.
28. G. Tobias, J. Oro-Sole, D. Beltran-Porter and A. Fuertes, *Inorg Chem*, 2001, **40**, 6867.
29. Y. Ohashi, T. Motohashi, Y. Masubuchi and S. Kikkawa, *J. Solid State Chem.*, 2010, **183**, 1710-1714.
30. S. Kikkawa, T. Takeda, A. Yoshiasa, P. Maillard and F. Tessier, *Mater. Res. Bull.*, 2008, **43**, 811-818.
31. S. H. Elder, F. J. DiSalvo, J. B. Parise, J. A. Hriljac and J. W. Richardson, *J. Solid State Chem.*, 1994, **108**, 73-79.
32. N. Arumugam, A. Honnorscheid and M. Jansen, *Z. Anorg. Allg. Chem.*, 2003, **629**, 939-941.
33. H. Yamane and F. J. DiSalvo, *J Alloy Compd*, 1996, **234**, 203-206.
34. M. T. Weller and S. J. Skinner, *Int J Inorg Mater*, 2000, **2**, 463-467.
